# Supplementary material for: Nuts as a replacement for carbohydrates in the diabetic diet: a reanalysis of a randomised controlled trial
Source: Diabetologia. 2018 May 23;61(8):1734–47. doi: 10.1007/s00125-018-4628-9 (PMC6061153; doi:10.1007/s00125-018-4628-9)
Supplement: Supplementary file 1 — (PDF 255 kb) [file 125_2018_4628_MOESM1_ESM.pdf]

## ESM Methods

### SAS code for Primary outcome

Code is bolded and explanations are asterisked.

```
proc mixed method = reml data = dm_nut;
    *Mixed model, residual maximum likelihood estimation method;
where week in (2,4,8,10,12);
    *All available data used;
class rand week id ;
model hba1c100_chg = time|rand/ddfm=kr(firstorder);
    *hba1c100_chg = change from baseline post-intervention data;
    *time = week, continuous;
    *rand*time = allows variation by time;
repeated week /subject=id type=sp(pow)(time);
    *Models serial correlation by correlating errors, spatial structure for unequal timepoints;
lsmeans rand /diff cl at time = 12;
    *Takes estimates from end of study;

run;
```

### SAS code for secondary outcomes (adjusted for stratification factors (sex and hba1c100>7.1) and baseline lipid medications with descriptions

Code is bolded and explanations are asterisked)

```
proc mixed method = reml data = dm_nut;
    *Mixed model, residual maximum likelihood estimation method;
where week in (2,4,8,10,12);
    *All available data used;
class rand week id sex_num dichohba1c100;
model secondary_chg = time|rand sex_num dichohba1c100 lipid_meds/ddfm=kr(firstorder);
    *secondary_chg = change from baseline post-intervention data;
    *time = week, continuous;
    *rand*time = allows variation by time;
    *sex_num = 0-Male and 1-Female;
    *dichohba1c100 = 0-baseline hba1c100 <=7.1 and 1- baseline hba1c100 >7.1;
    *lipid_meds = lipid medication use;
repeated week /subject=id type=sp(pow)(time);
    *Models serial correlation by correlating errors, spatial structure for unequal timepoints;
lsmeans rand /diff cl at time = 12 adjdfe = row adjust = tukey;
    *Takes estimates from end of study, Tukey adjustment for multiple comparisons;

run;
```

**ESM Table 1** Amounts and Nutritional Analysis of Prescribed Supplements per day

| Treatment and Dose <sup>a</sup> | Total<br>Participants | Energy<br>MJ (kcal) | % energy <sup>c</sup> | Total<br>Fat (g) | MUFA<br>(g) | PUFA<br>(g) | SFA<br>(g) | Dietary<br>Cholesterol (mg) | Total<br>Protein (g) | Plant<br>Protein (g) | Total<br>Carb (g) | Total<br>Fibre (g) | Soluble<br>Fibre (g) | Available<br>Carb (g) | Omega<br>3 (g) | Omega<br>6 (g) |
|---------------------------------|-----------------------|---------------------|-----------------------|------------------|-------------|-------------|------------|-----------------------------|----------------------|----------------------|-------------------|--------------------|----------------------|-----------------------|----------------|----------------|
| Full Dose Nuts                  |                       |                     |                       |                  |             |             |            |                             |                      |                      |                   |                    |                      |                       |                |                |
| >10 MJ = 100g nuts              | 0                     | 2.66 (636)          | <26.5                 | 58.3             | 32.9        | 16          | 6.8        | 0                           | 16                   | 16                   | 20.1              | 8.4                | 1.4                  | 11.7                  | 1.3            | 14.7           |
| 6.7-10 MJ = 75g nuts            | 38                    | 2.00 (477)          | 19.9-29.8             | 43.8             | 24.7        | 12          | 5.1        | 0                           | 12                   | 12                   | 15                | 6.3                | 1.1                  | 8.8                   | 1              | 11             |
| <6.7 MJ = 50g nuts              | 2                     | 1.33 (318)          | >19.9                 | 29.2             | 16.4        | 8           | 3.4        | 0                           | 8                    | 8                    | 10                | 4.2                | 0.7                  | 5.9                   | 0.7            | 7.3            |
| Half Dose Nuts                  |                       |                     |                       |                  |             |             |            |                             |                      |                      |                   |                    |                      |                       |                |                |
| >10 MJ                          | 1                     | 2.65 (633)          | <26.3                 | 43.2             | 18.2        | 16          | 6.8        | 1.3                         | 16                   | 12.9                 | 53.1              | 8.4                | 1.5                  | 44.8                  | 0.7            | 15.3           |
| 6.7-10 MJ                       | 36                    | 1.98 (474)          | 19.8-29.6             | 32.4             | 13.6        | 12          | 5.1        | 1                           | 12                   | 9.6                  | 39.9              | 6.3                | 1.1                  | 33.6                  | 0.5            | 11.5           |
| <6.7 MJ                         | 1                     | 1.32 (316)          | >19.8                 | 21.6             | 9.1         | 8           | 3.4        | 0.7                         | 8                    | 6.4                  | 26.6              | 4.2                | 0.8                  | 22.4                  | 0.4            | 7.7            |
| Muffins <sup>b</sup>            |                       |                     |                       |                  |             |             |            |                             |                      |                      |                   |                    |                      |                       |                |                |
| >10 MJ = 4 muffins              | 1                     | 2.63 (629)          | <26.2                 | 28.1             | 3.5         | 16          | 6.8        | 2.6                         | 16                   | 9.7                  | 86.2              | 8.4                | 1.6                  | 77.9                  | 0              | 16             |
| 6.7-10 MJ = 3 muffins           | 36                    | 1.97 (471)          | 19.6-29.4             | 21.1             | 2.6         | 12          | 5.1        | 2                           | 12                   | 7.3                  | 64.7              | 6.3                | 1.2                  | 58.4                  | 0              | 12             |
| <6.7 MJ = 2 muffins             | 2                     | 1.31 (314)          | >19.6                 | 14               | 1.7         | 8           | 3.4        | 1.3                         | 8                    | 4.9                  | 43.1              | 4.2                | 0.8                  | 38.9                  | 0              | 8              |

<sup>a</sup> > 10MJ (>2400 kcals); 6.7-10MJ (1600 – 2400 kcals); and 6.7MJ (<1600 kcals).

<sup>b</sup> 1 muffin = 62.5g.

<sup>c</sup> The full dose nut therefore provided 23.9% of energy on an 8.4 MJ diet.

**ESM Table 2** Nutritional Profiles at week 0 and week 12 for Participants Consuming Full Nut Dose, Half Nut & Muffins

|                                                | Week 0      |                               |               | Week 12                  |                  |               |
|------------------------------------------------|-------------|-------------------------------|---------------|--------------------------|------------------|---------------|
|                                                | Nuts (N=39) | Half dose (N=37) <sup>a</sup> | Muffin (N=39) | Nuts (N=39) <sup>b</sup> | Half dose (N=32) | Muffin (N=32) |
| Energy (MJ) <sup>c</sup>                       | 7.8(3.3)    | 7.7 (2.7)                     | 7.7 (2.9)     | 8.5(2.0)                 | 8.2 (2.6)        | 7.6 (2.8)     |
| Energy (kcal) <sup>c</sup>                     | 1863 (780)  | 1839 (641)                    | 1837 (694)    | 2024 (483)               | 1960 (621)       | 1821 (676)    |
| Total fat (% energy) <sup>d</sup>              | 32 (7)      | 33 (6)                        | 34 (6)        | 42 (4)                   | 39 (5)           | 36 (4)        |
| MUFA (% energy) <sup>d</sup>                   | 12.8 (3.5)  | 13.4 (2.6)                    | 13.4 (3.5)    | 19.6 (2)                 | 15.8 (2.8)       | 11.4 (2.6)    |
| PUFA (% energy) <sup>d</sup>                   | 6.6 (2.1)   | 6.7 (2.1)                     | 6.9 (2.1)     | 9.5 (1.7)                | 9.8 (1.7)        | 10.4 (2.1)    |
| SFA (% energy) <sup>d</sup>                    | 9.9 (2.7)   | 10.2 (2.9)                    | 10.7 (3)      | 9.4 (2)                  | 10.1 (2.3)       | 10.7 (1.8)    |
| Dietary Cholesterol (mg/MJ) <sup>c</sup>       | 0.64 (0.26) | 0.55 (0.21)                   | 0.62 (0.41)   | 0.48 (0.28)              | 0.54 (0.32)      | 0.48 (0.22)   |
| Dietary Cholesterol (mg/kcal) <sup>c</sup>     | 153 (63)    | 132 (49)                      | 148 (98)      | 114 (67)                 | 130 (76)         | 115 (53)      |
| Total protein (% energy) <sup>d</sup>          | 20 (4)      | 20 (4)                        | 20 (3)        | 18 (3)                   | 19 (3)           | 20 (4)        |
| Plant Protein (% energy) <sup>c</sup>          | 7 (3)       | 7 (2)                         | 7 (3)         | 8 (2)                    | 8 (2)            | 7 (2)         |
| Available Carbohydrate (% energy) <sup>d</sup> | 45 (10)     | 45 (8)                        | 44 (8)        | 39 (7)                   | 41 (6)           | 44 (6)        |
| Starch (% energy) <sup>c</sup>                 | 27 (12)     | 30 (8)                        | 28 (9)        | 12 (7)                   | 13 (5)           | 14 (7)        |
| Sugar (% energy) <sup>d</sup>                  | 16 (6)      | 14 (4)                        | 15 (5)        | 25 (5)                   | 27 (5)           | 28 (5)        |
| Fibre (g/MJ) <sup>c</sup>                      | 0.06 (0.02) | 0.06 (0.02)                   | 0.06 (0.03)   | 0.06 (0.01)              | 0.06 (0.02)      | 0.06 (0.02)   |
| Fibre (g/kcal) <sup>c</sup>                    | 15 (5)      | 15 (6)                        | 13 (8)        | 14 (3)                   | 15 (5)           | 14 (4)        |
| Alcohol (% energy) <sup>c</sup>                | 0 (3)       | 0 (2)                         | 0 (3)         | 0 (3)                    | 0 (1)            | 0 (2)         |
| Glycemic Index <sup>c</sup>                    | 78 (7)      | 80 (9)                        | 79 (5)        | 75 (9)                   | 79 (6)           | 81 (6)        |
| Glycemic Load <sup>c</sup>                     | 114 (52)    | 120 (66)                      | 106 (60)      | 106 (43)                 | 116 (57)         | 119 (45)      |
| Nuts (g/day) <sup>c</sup>                      | 6 (17)      | 10 (21)                       | 5 (17)        | 75 (5)                   | 38 (10)          | 0 (3)         |
| Supplements (% energy) <sup>d</sup>            |             |                               |               | 24 (5)                   | 26 (8)           | 25 (8)        |

<sup>a</sup> Also in the half nut dose diet one participant dropped out before providing a baseline diet record.

<sup>b</sup> One full dose nut participant had no baseline diet record and a further full dose nut participant dropped out before completion. Therefore only 38 participants diet records on the full dose nut diet were available to calculate change in dietary intake.

<sup>c</sup> Data are medians (interquartile ranges) for non-normally distributed data.

<sup>d</sup> Data are means (standard deviation) for normally distributed data.

**ESM Table 3** Treatment Differences in change for energy, nutrients, fiber, and supplement intake in the Intention-to-Treat Analysis (n=108/117)<sup>a</sup>

|                                       | Full Nut vs Muffin |                 |          |                |              | Full Nut vs Half Nut |                 |          |                 |              | Half Nut vs Muffin |                |          |                 |              |
|---------------------------------------|--------------------|-----------------|----------|----------------|--------------|----------------------|-----------------|----------|-----------------|--------------|--------------------|----------------|----------|-----------------|--------------|
|                                       | $\beta$            | 95% CI          | <i>p</i> | Adj CI         | Adj <i>p</i> | $\beta$              | 95% CI          | <i>p</i> | Adj CI          | Adj <i>p</i> | $\beta$            | 95% CI         | <i>p</i> | Adj CI          | Adj <i>p</i> |
| Energy (MJ)                           | 0.62               | (-0.18, 1.42)   | 0.128    | (-0.34, 1.59)  | 0.28         | 0.06                 | (-0.76, 0.87)   | 0.891    | (-0.92, 1.03)   | 0.99         | 0.57               | (-0.26, 1.4)   | 0.179    | (-0.43, 1.56)   | 0.368        |
| Energy (kcal)                         | 148.8              | (-43.7, 341.4)  | 0.128    | (-82.1, 379.8) | 0.28         | 13.4                 | (-180.7, 207.5) | 0.891    | (-219.3, 246.2) | 0.99         | 135.4              | (-62.9, 333.8) | 0.179    | (-102.4, 373.3) | 0.368        |
| Total fat (% energy)                  | 8.38               | (5.07, 11.69)   | <.0001   | (4.41, 12.35)  | <.0001       | 3.19                 | (-0.14, 6.53)   | 0.06     | (-0.81, 7.19)   | 0.144        | 5.19               | (1.78, 8.6)    | 0.003    | (1.1, 9.27)     | 0.009        |
| MUFA (% energy)                       | 9.2                | (7.5, 10.9)     | <.0001   | (7.1, 11.3)    | <.0001       | 4.3                  | (2.6, 6.1)      | <.0001   | (2.2, 6.4)      | <.0001       | 4.9                | (3.1, 6.7)     | <.0001   | (2.8, 7)        | <.0001       |
| PUFA (% energy)                       | -0.41              | (-1.56, 0.74)   | 0.484    | (-1.79, 0.97)  | 0.763        | -0.5                 | (-1.66, 0.66)   | 0.392    | (-1.89, 0.89)   | 0.667        | 0.09               | (-1.09, 1.28)  | 0.874    | (-1.33, 1.52)   | 0.986        |
| SFA (% energy)                        | -0.47              | (-1.64, 0.7)    | 0.427    | (-1.87, 0.93)  | 0.705        | -0.48                | (-1.66, 0.7)    | 0.421    | (-1.89, 0.93)   | 0.699        | 0.01               | (-1.2, 1.21)   | 0.987    | (-1.44, 1.45)   | 1            |
| Dietary Cholesterol (mg/ MJ)          | -0.06              | (-0.17, 0.05)   | 0.306    | (-0.2, 0.08)   | 0.561        | -0.11                | (-0.22, 0.01)   | 0.063    | (0.25, 0.03)    | 0.15         | 0.05               | (-0.07, 0.17)  | 0.402    | (-0.09, 0.19)   | 0.678        |
| Dietary Cholesterol (mg/kcal)         | -14                | (-41, 13)       | 0.306    | (-47, 19)      | 0.561        | -26                  | (-54, 1)        | 0.063    | (-59, 7)        | 0.15         | 12                 | (-16, 40)      | 0.402    | (-22, 46)       | 0.678        |
| Total protein (% energy)              | -1.66              | (-3.32, -0.004) | 0.0495   | (-3.65, 0.33)  | 0.12         | -1.12                | (-2.8, 0.55)    | 0.185    | (-3.13, 0.88)   | 0.38         | -0.54              | (-2.25, 1.17)  | 0.533    | (-2.59, 1.51)   | 0.806        |
| Plant Protein (% energy) <sup>a</sup> | 0.13               | (0.02, 0.24)    | 0.02     | (0, 0.26)      | 0.051        | 0.03                 | (-0.08, 0.14)   | 0.597    | (-0.1, 0.16)    | 0.857        | 0.1                | (-0.01, 0.21)  | 0.078    | (-0.03, 0.23)   | 0.181        |
| Available Carbohydrate (% energy)     | -6.5               | (-10.3, -2.7)   | 0.001    | (-11.1, -2)    | 0.003        | -2.3                 | (-6.1, 1.6)     | 0.241    | (-6.9, 2.3)     | 0.468        | -4.2               | (-8.1, -0.3)   | 0.035    | (-8.9, 0.5)     | 0.087        |
| Starch (% energy)                     | -3.36              | (-6.42, -0.3)   | 0.032    | (-7.03, 0.31)  | 0.08         | 0.28                 | (-2.81, 3.36)   | 0.86     | (-3.42, 3.97)   | 0.983        | -3.63              | (-6.78, -0.48) | 0.024    | (-7.41, 0.15)   | 0.062        |
| Sugar (% energy)                      | -3.14              | (-5.4, -0.88)   | 0.007    | (-5.85, -0.43) | 0.019        | -2.55                | (-4.83, -0.27)  | 0.029    | (-5.28, 0.18)   | 0.072        | -0.59              | (-2.92, 1.74)  | 0.617    | (-3.38, 2.2)    | 0.87         |
| Fibre (g/ MJ) <sup>a</sup>            | -0.12              | (-0.25, 0.02)   | 0.087    | (-0.28, 0.04)  | 0.2          | -0.08                | (-0.22, 0.05)   | 0.229    | (-0.24, 0.08)   | 0.449        | -0.03              | (-0.17, 0.1)   | 0.624    | (-0.2, 0.13)    | 0.875        |
| Fibre (g/ kcal) <sup>a</sup>          | -0.12              | (-0.25, 0.02)   | 0.087    | (-0.28, 0.04)  | 0.2          | -0.08                | (-0.22, 0.05)   | 0.229    | (-0.24, 0.08)   | 0.449        | -0.03              | (-0.17, 0.1)   | 0.624    | (-0.2, 0.13)    | 0.875        |
| Alcohol (% energy) <sup>a</sup>       | -0.08              | (-0.76, 0.6)    | 0.812    | (-0.9, 0.74)   | 0.969        | 0                    | (-0.69, 0.69)   | 0.996    | (-0.84, 0.84)   | 1            | -0.08              | (-0.74, 0.58)  | 0.81     | (-0.88, 0.72)   | 0.968        |
| Glycemic Index <sup>a</sup>           | -0.09              | (-0.16, -0.02)  | 0.008    | (-0.17, -0.01) | 0.021        | -0.04                | (-0.1, 0.03)    | 0.247    | (-0.12, 0.04)   | 0.477        | -0.05              | (-0.12, 0.02)  | 0.137    | (-0.13, 0.03)   | 0.296        |
| Glycemic Load                         | -16                | (-31, -1)       | 0.047    | (-34, 3)       | 0.114        | -6                   | (-22, 9)        | 0.428    | (-25, 12)       | 0.706        | -9                 | (-25, 6)       | 0.242    | (-28, 10)       | 0.469        |
| Nuts (g/day) <sup>a</sup>             | 2.87               | (1.92, 3.81)    | <.0001   | (1.73, 4)      | <.0001       | 0.92                 | (0.29, 1.56)    | 0.005    | (0.16, 1.68)    | 0.014        | 1.94               | (0.99, 2.9)    | 0.0001   | (0.8, 3.09)     | 0.0004       |
| Supplements (% energy)                | -1.47              | (-4.77, 1.83)   | 0.378    | (-5.43, 2.48)  | 0.651        | -3.42                | (-6.7, -0.14)   | 0.041    | (-7.36, 0.52)   | 0.102        | 1.95               | (-1.49, 5.39)  | 0.263    | (-2.17, 6.07)   | 0.501        |

Outcome is change, modelled as change from baseline. Estimates taken from week 12 using least squares means with Tukey adjusted *p*-values and confidence limits, from a repeated measures model using PROC MIXED of SAS 9.4, with sex, binary HbA1c and lipid medications as covariates.

<sup>a</sup> Log<sub>e</sub> transformation of data for which residuals were not normally distributed.

**ESM Table 4** Dose Response Regression Model for the blood and particle size\*

|                              | $\beta$ | $p$    |
|------------------------------|---------|--------|
| HbA1c (%)                    | -0.18   | 0.044  |
| HbA1c (mmol/mol)             | -2.0    | 0.044  |
| Total cholesterol (mmol/l)   | -0.25   | 0.022  |
| LDL cholesterol (mmol/l)     | -0.23   | 0.019  |
| HDL cholesterol (mmol/l)     | 0.01    | 0.618  |
| Triacylglycerols (mmol/l)    | -0.07   | 0.461  |
| Total cholesterol: HDL ratio | -0.22   | 0.083  |
| LDL: HDL ratio               | -0.20   | 0.057  |
| Non-HDL cholesterol          | -0.26   | 0.020  |
| Triacylglycerols: HDL ratio  | -0.04   | 0.681  |
| ApoA1                        | -0.02   | 0.403  |
| ApoB                         | -0.06   | 0.013  |
| ApoB:apoA                    | -0.03   | 0.088  |
| Small LDL (< 255 Å, mmol/l)  | -0.42   | 0.0003 |

\* p-values taken from the dose-response regression models. The change in biochemical measures (HbA<sub>1c</sub>, lipids and lipoproteins) was calculated as values at the end of treatment (defined as the mean of week 8–12 values) minus the pooled baseline values. Total n= 103 (39 nut, 32 half nut, 32 muffin).

**ESM Figure 1:**  
Flow of Participants through  
the Trial

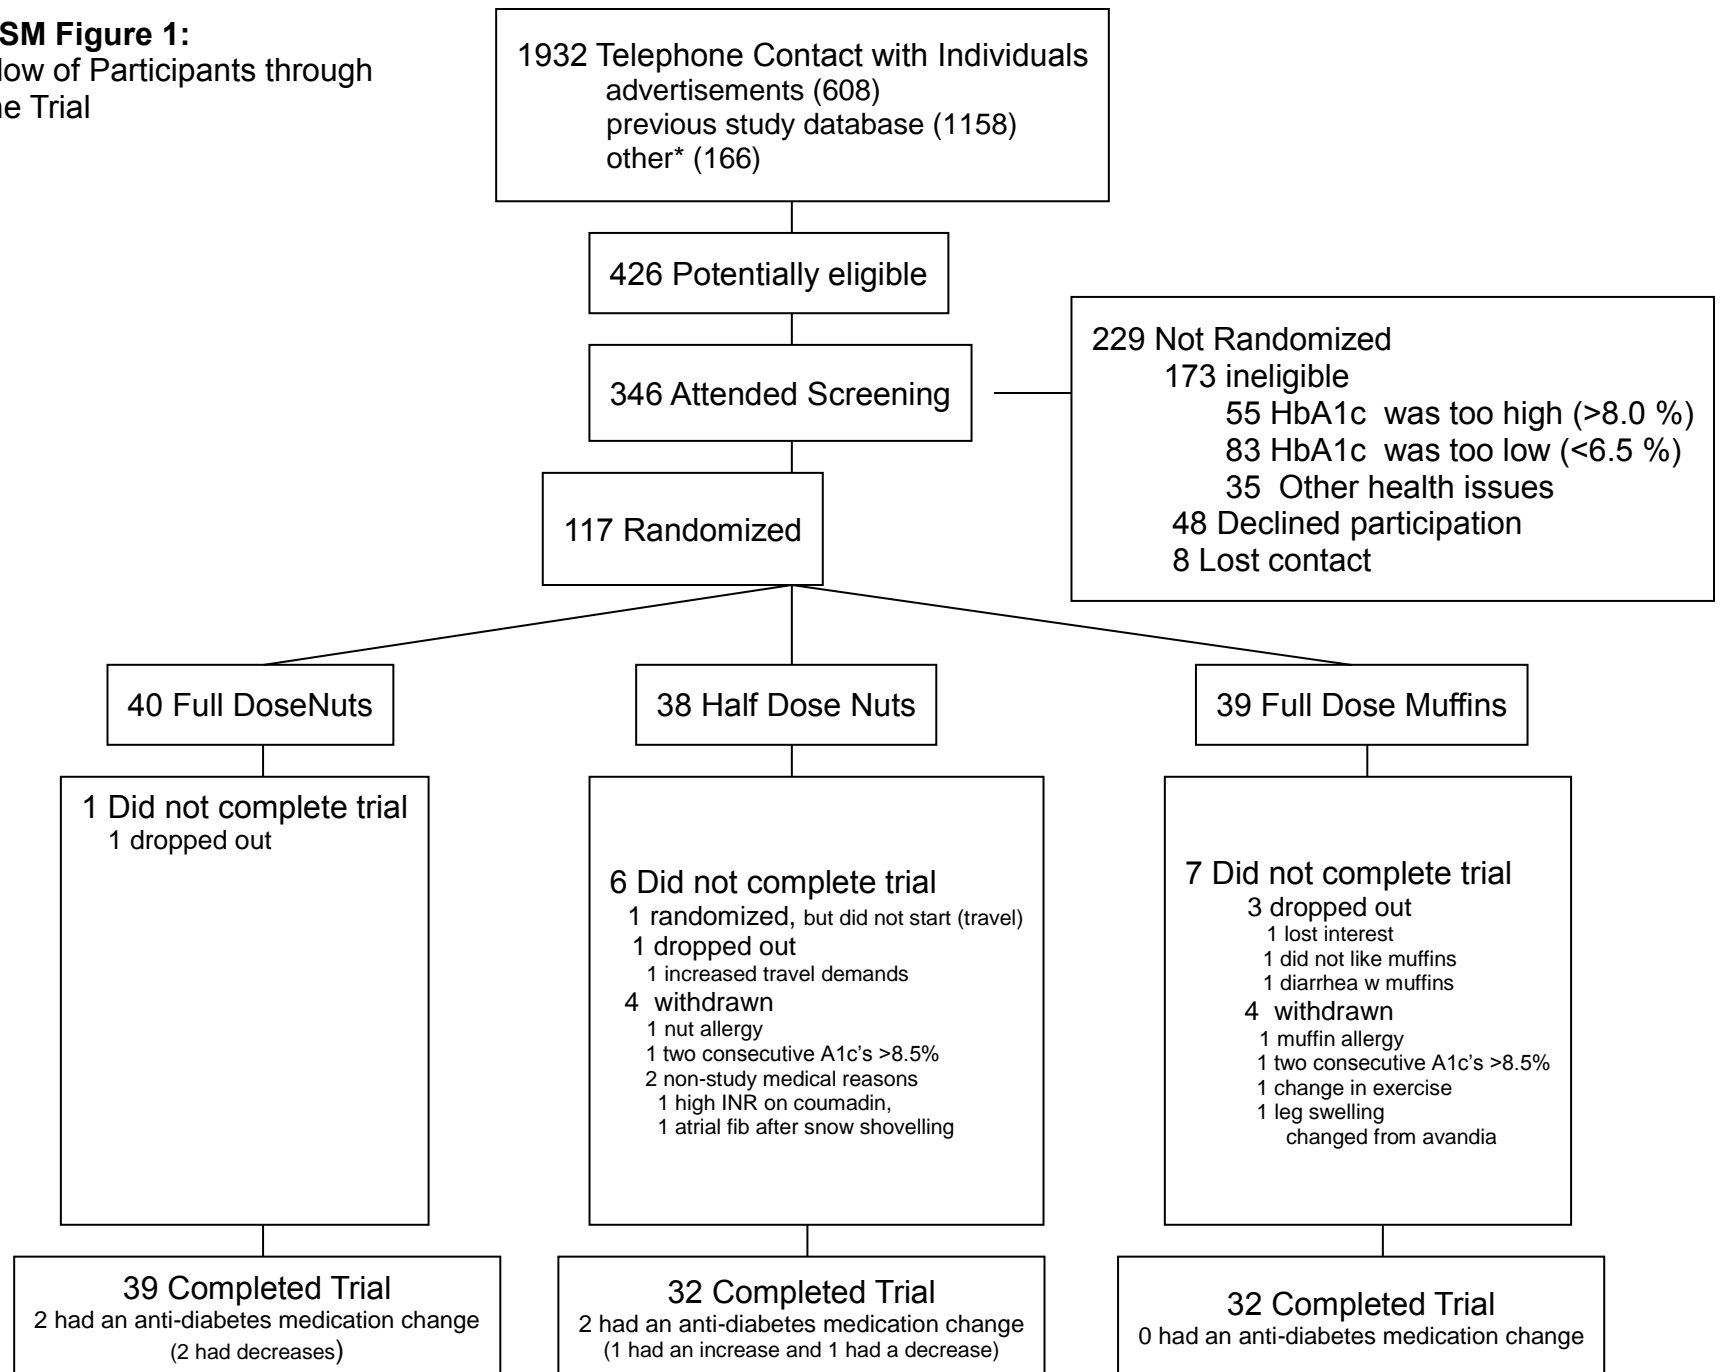

\* Other includes – word of mouth, Diabetes clinic, postings in hospital, other studies, not indicated/unknown
